# Supplementary material for: Changes in benzodiazepine use in the French general population after November 2015 terrorist attacks in Paris: an interrupted time series analysis of the national CONSTANCES cohort
Source: HighWire-hosted journal article supplement (doi:10.1136/bmjopen-2020-044891), 2021-09-01
Supplement: bmjopen-2020-044891supp001_data_supplement.pdf [file bmjopen-2020-044891supp001_data_supplement.pdf]

**Supplemental Material****Supplemental Table : Participants' characteristics (N=90,258)**

| <b>CONTINUOUS VARIABLE</b>                             | <b>Median</b> | <b>Interquartile range</b> |
|--------------------------------------------------------|---------------|----------------------------|
| <b>Age</b>                                             | 49            | 37-60                      |
| <b>CATEGORICAL VARIABLES</b>                           |               |                            |
|                                                        | <b>n</b>      | <b>%</b>                   |
| <b>Gender</b>                                          |               |                            |
| Men                                                    | 42,218        | 46.8                       |
| Women                                                  | 48,040        | 53.2                       |
| <b>Education ISCED Classification<sup>1</sup></b>      |               |                            |
| 0-2                                                    | 7,858         | 8.8                        |
| 2-4                                                    | 29,363        | 33.1                       |
| 5-6                                                    | 30,540        | 34.4                       |
| 7-8                                                    | 21,016        | 23.7                       |
| <b>Household income in euros per month<sup>2</sup></b> |               |                            |
| Less than 2100                                         | 19,752        | 23.6                       |
| 2100-2800                                              | 13,788        | 16.4                       |
| 2800-4200                                              | 26,254        | 31.3                       |
| >4200                                                  | 24,010        | 28.7                       |
| <b>Residence area</b>                                  |               |                            |
| Paris region                                           | 16,075        | 17.8                       |
| Outside Paris region                                   | 74,183        | 82.2                       |

ISCED: 2011 International Standard Classification of Education.

<sup>1</sup>Among 88,777 participants with no missing data; <sup>2</sup>Among 83,804 participants with no missing data.
